# Supplementary material
Source: ML conference proceedings conference paper supplement (https://www.ecva.net/papers/eccv_2024/papers_ECCV/html/1287_ECCV_2024_paper.php)
Supplement: Supplementary file 1 [file 01287-supp.pdf]

# Supplementary Material for VisFocus: Prompt-Guided Vision Encoders for OCR-Free Dense Document Understanding

Ofir Abramovich<sup>1\*</sup>, Niv Nayman<sup>2†</sup>, Sharon Fogel<sup>\*</sup>, Inbal Lavi<sup>\*</sup>, Ron Litman<sup>2</sup>,  
Shahar Tsiper<sup>2</sup>, Royee Tichauer<sup>2</sup>, Srikar Appalaraju<sup>2</sup>, Shai Mazor<sup>2</sup>, and R.  
Manmatha<sup>2</sup>

<sup>1</sup> Reichman University, Israel    <sup>2</sup> AWS AI Labs

## A VisFocus Visualization

### A.1 LMPM Pre-training

To further elucidate the efficacy of LMPM pre-training in focusing where prompt-related textual regions are, we conduct an additional extensive visualization in Fig. 1, showing multiple text tokens’ aggregated attention maps across the document. It can be seen that most of the attention is activated where the sampled text snippet (served as the prompt) originally lies.

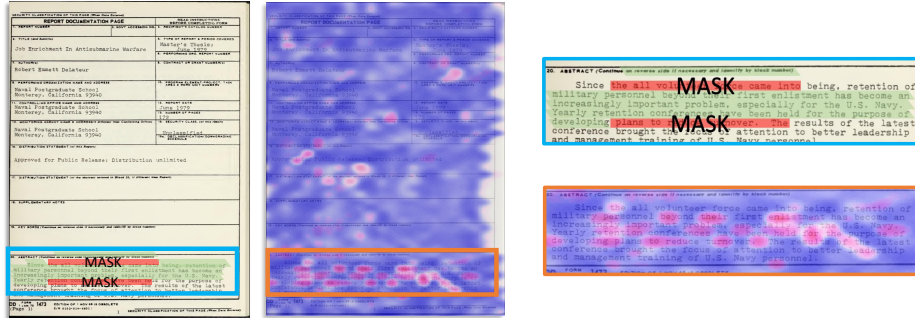

**Fig. 1: Aggregated Token Visualizations for LMPM.** We combine multiple attention maps between textual and visual token from the last layer of our document encoder. ■ denotes randomly sampled text snippets.

\*Work done during an internship\employment at Amazon

† Corresponding author: [nivnay@amazon.com](mailto:nivnay@amazon.com)

## A.2 VQA Fine-tuning

As discussed, our novel LMPM pre-training encourages the model to focus on relevant portions of the document, concerning the input query. This is particularly demonstrated by the learned attention maps within the last ViLMA layers (Figs. 3a, 4 and 5), highlighting the correspondence between similar textual (query) and visual (context) tokens. The learned attention encompasses both literal word-level alignment (‘center’  $\leftrightarrow$  ‘center’ in Fig. 3a, ‘100’  $\leftrightarrow$  ‘100’ in Fig. 4b) and semantic relations (‘birth’  $\leftrightarrow$  ‘national’ in Fig. 3a, ‘be’  $\leftrightarrow$  ‘are’ in Fig. 4a, ‘height’  $\leftrightarrow$  ‘weight’ in Fig. 5c).

## B OCR-Free vs. OCR-Based

The OCR-free branch in document understanding aims to eliminate the need for external OCR systems, offering a more efficient standalone approach for processing document images. Consequently, OCR-free models’ performance currently lags behind traditional OCR-based methods. This limitation stems from the absence of explicit textual information, which OCR-based models leverage as an additional input modality. Tab. 1 compares the two branches. Despite the remaining performance gaps, OCR-based methods depend on external systems, which indirectly add model parameters and are prone to error propagation and thus heavily rely on the quality of the OCR engines.

**Table 1: Comparison with OCR-based methods on VQA benchmarks.** While the OCR-based approach still dominates in performance, the remaining gap with respect to OCR-free methods depends on the quality of external OCR engines which also implicitly add more parameters ( $P^*$ ) and complexity to the system.

| Method    |                   | #params      | DocVQA             | InfoVQA     |
|-----------|-------------------|--------------|--------------------|-------------|
|           |                   |              | ANLS               | ANLS        |
| OCR-based | LayoutLMV2-B [6]  | 200M + $P^*$ | 78.1               | -           |
|           | LayoutLMV2-L [6]  | 426M + $P^*$ | 83.4               | -           |
|           | LayoutLMV3 [6]    | 794M + $P^*$ | 83.4               | 45.1        |
|           | UDOP [20]         | 794M + $P^*$ | 84.7               | 47.4        |
|           | DocFormerV2-L [1] | 368M + $P^*$ | <b>87.8</b>        | <b>48.8</b> |
| OCR-free  | Dessurt [4]       | 127M         | 63.2               | -           |
|           | Donut [10]        | 176M         | 67.5               | 11.6        |
|           | ScreenAI-B [2]    | 670M         | 50.7               | -           |
|           | Pix2Struct-B [11] | 282M         | 72.1               | <b>38.2</b> |
|           | VisFocus-B        | 408M         | <b>72.9 (+1.2)</b> | 31.9 (+5.1) |

## C Qualitative Comparisons

Figs. 6 to 10 provide additional examples where VisFocus-B excels in comparison to our baseline and Pix2Struct-B and Fig. 11 extends the comparison to other OCR-free methods: Dessurt, Donut and Pix2Struct-B. It can be seen that all but VisFocus often predict wrong answers, extracted from somewhere in the document. This implies on the lack of focusing, as discussed in A, which leads to extraction of unrelated information and in turn to wrong predictions. Fig. 12 shows fail cases of VisFocus compared to other OCR-free methods.

## D VisFocus on Zero-shot Key-Value Extraction

VisFocus is originally designed for prompt-related document VQA tasks, but can be adapted to demonstrate its versatility on other document understanding tasks. One such task is key-value extraction, which can be reformulated as a prompt-related task. This reformulation allows leveraging VisFocus’s capabilities beyond its original design scope.

To accomplish this, the key-value extraction task is reframed using a prompt template: “What is the value of  $\langle key \rangle$ ?”. where  $\langle key \rangle$  is some key in the form/receipt (Fig. 2). We refer to this task as *relaxed KV extraction*, since one should know a key in the document, and prompt it. We evaluate our proposed task on the FUNSD dataset [7], using DocVQA-finetuned checkpoints of VisFocus and previous works, and report superior performance in the zero-shot setting (Tab. 2). This evaluation strategy demonstrates the flexibility of prompt-based models like VisFocus and explores their potential for tackling diverse document understanding tasks through clever task reformulation.

**Table 2: Comparison of zero-shot Relaxed KV Extraction task on FUNSD dataset.** We report ANLS on the test set, applying the reformulated KV task.

| Method       | ANLS               |
|--------------|--------------------|
| Donut        | 58.9               |
| VisFocus-S   | <b>60.2</b> (+1.3) |
| Pix2Struct-B | 62.7               |
| VisFocus-B   | <b>63.4</b> (+0.7) |

## E Datasets and Hyperparameters

In this section we present in detail every benchmark and dataset used in our work. For more pre-training and fine-tuning details see Tabs. 3 and 4.

### E.1 Pre-training Data

For pretraining data, we utilize the IDL-OCR dataset [3], comprising 26M document pages accompanied by corresponding raster-scan OCR outputs. In Tab. 5

**AMES ASSAY FOR MUTAGENICITY**

COMPOUND: Diethyl 3,3-Dimethyl-2-oxo-1,4-cyclopentenedicarboxylate

SOURCE: Lorillard - Organic Chemistry    LORILLARD NO: A123    LOT NO: OR67-13

DATE RECEIVED: unknown    TESTED: 3/18/81-4/8/81    REPORTED: 4/14/81

INVESTIGATOR(S): H. S. Tong & A. A. Poole    NOTEBOOK PAGE: BC19-25

SIGNATURE(S): *H. S. Tong*    *A. A. Poole*

TOXICITY (% SURVIVAL):

|                       |    |      |
|-----------------------|----|------|
|                       | 50 | 100  |
| CONCENTRATION (mg/ml) |    | .025 |

SOLVENT: ☒ DMSO    ☐ WATER    ☐ OTHER

S. TYPHIMURUM:

|                                                |         |         |         |         |         |
|------------------------------------------------|---------|---------|---------|---------|---------|
|                                                | TA1538  | TA100   | TA98    |         |         |
|                                                | (-)-5-9 | (-)-5-9 | (-)-5-9 | (-)-5-9 | (-)-5-9 |
| CONTROL REVERTANTS PER PLATE (0.05 ml SOLVENT) | 9.67    | 14.00   | 118.00  | 127.00  | 9.00    |

```

{
  'source': 'Lorillard - Organic Chemistry',
  'LORILLARD NO.': 'A123',
  ...
  'SIGNATURE(S)': 'A. Q. Poole'
}

```

-->

Q: "What is the value of 'source'?"  
A: "Lorillard - Organic Chemistry"

Q: "What is the value of 'LORILLARD NO.'?"  
A: "A123",

...

Q: "What is the value of 'SIGNATURE(S)'?"  
A: "A. Q. Poole"

**Fig. 2: Visualization of the Relaxed KV Extraction.** We re-define the key-value extraction as a prompt-based task to apply zero-shot on VQA fine-tuned models.   and   denote keys and values respectively.

we compare our pre-training data with previous methods. [4, 11] create different labels for documents, whereas we employ only the OCR text, similar to [10]. Dessurt collects textual data to create synthetic documents using open-sourced fonts. It also re-renders IIT-CDIP [5, 12] and FUNSD [7] with different fonts and layouts, while Pix2Struct scrape the web to generate structured representations of documents (HTML DOMs). Pre-training our model with text-oriented approaches, further provides an advantage for our method when dealing with dense documents of many words.

## E.2 Downstream Tasks

Here we provide technical details about the downstream datasets we experimented with and some bottom line results.

**DocVQA** [17] is an open-ended VQA dataset consists of various types of scanned documents. It is a subset of IDL corpus, consists of  $\sim 14k$  document images and  $\sim 40k$  questions. We use the ANLS metric and report a boost of +1.2 on the test split over the baseline, and +0.8 over Pix2Struct-B, which is the current state-of-the-art on small OCR-free models.



**Table 3: Model hyper-parameters for pre-training.** We use AdamW [14] optimizer and Cosine Annealing [13] scheduler. We train on 8 A100 GPUs. ‘\*’ denotes early stopping. All reported numbers apply for all our model variants.

| PT Stage | #steps | Batch Size | Base LR  | Image Resolution  |
|----------|--------|------------|----------|-------------------|
| LtR      | 200K*  | 32         | $1e - 4$ | $1536 \times 768$ |
| LMPM     | 400K   | 48         |          |                   |

**Table 4: Model hyper-parameters for fine-tuning.** Same as in pre-training, in all our experiments we adopt AdamW [14] optimizer, Cosine Annealing [13] scheduler, early-stopping and train on 8 A100 GPUs.

|            | Dataset | #Steps | Batch Size | Base LR  | Image Resolution  |
|------------|---------|--------|------------|----------|-------------------|
| VisFocus-S | DocVQA  | 15K    | 72         | $1e - 4$ | $1536 \times 768$ |
|            | InfoVQA | 15K    | 32         | $5e - 5$ |                   |
|            | ChartQA | 15K    | 72         | $2e - 4$ |                   |
|            | OCR-VQA | 50K    | 64         | $5e - 5$ |                   |
|            | AI2D    | 30K    | 512        | $1e - 4$ |                   |
| VisFocus-B | DocVQA  | 15K    | 72         | $1e - 4$ | $1536 \times 768$ |
|            | InfoVQA | 15K    | 144        | $1e - 4$ |                   |
|            | ChartQA | 15K    | 72         | $2e - 4$ |                   |
|            | OCR-VQA | 50K    | 144        | $1e - 4$ |                   |
|            | AI2D    | 30K    | 32         | $5e - 5$ |                   |

**InfographicsVQA (InfoVQA)** [16] contains various infographics with annotations for questions that demand reasoning across text, layout, graphics, and data visualizations. It consists of  $\sim 5k$  images and  $\sim 30k$  questions. Since VisFocus was trained to encode the question with respect the question, and given that InfoVQA has more visual than textual content, along with complex numerical reasoning, its performance drops and becomes less competitive. However, our approach still beats the baseline by +5.1 points.

**ChartQA** [15] is a large-scale benchmark dataset designed to evaluate models’ ability to answer complex questions about charts, requiring both visual and logical reasoning. It consists of 9.6K human-written questions and 23.1K generated questions based on summaries. We follow previous works and report average Relaxed Accuracy (RA) of each split. Even though VisFocus is not trained on

**Table 5:** Pre-training Data. Comparison with previous OCR-Free methods. ‘T’ is denoted as the IIT-CDIP dataset [5], ‘Form’, ‘Handwriting’, and ‘Wiki’ are synthetic datasets presented in [4]. OCR refers to raster-scan order.

|                 | Pre-training Datasets   | Annotations     | #Samples     |
|-----------------|-------------------------|-----------------|--------------|
| Dessurt [4]     | I+Form+Handwriting+Wiki | OCR             | not reported |
| Donut [10]      | I+SynthDog [10]         | OCR             | 13.5M        |
| Pix2Struct [11] | C4 [19]                 | HTML DOMs + OCR | 80M          |
| VisFocus        | IDL-OCR [3]             | OCR             | 25.6M        |

structure-related tasks, it achieves an improvement of **+4.6** over the baseline, and exceeding previous works.

**OCR-VQA [18]** is a large-scale dataset of  $\sim 200k$  book cover images and  $1M$  questions. The task requires high skills of reading text. We report Exact Match (EM) on the test set and outperform our baseline by **+3.1** and **+0.6** points over the baseline and Pix2Struct-B, respectively.

**AI2 Diagrams (AI2D) [9]** consists of  $\sim 5K$  grade-school science diagrams, corresponding multiple-choice questions testing comprehension and reasoning about the diagrams. VisFocus-B achieves a **+2.2** boost over the baseline and **+6.9** compared to Pix2Struct-B, the prior state-of-the-art model in our setting.

### E.3 Prompt Encoding

To quantify the impact of the prompt encoding, we conduct an ablation study on several different text encoding techniques, involving both context-aware encoding (T5 encoder [19], TinyBERT [8]) and independent learned token embeddings (Tab. 6). It can be seen that designated T5 based encoders perform best, possibly due to the alignment with the T5 language model cascaded to the vision encoder. Reducing its size by about 65% decreases the DocVQA ANLS by merely 0.2. This motivates further research of smaller variants for T5 to be utilized in our framework.

**Table 6: Prompt Encoding Ablation Study.** ‘Embedding’ denotes independent token embedding and ‘shared’ as the VisFocus’s LM encoder. ‘shared’ uses the T5 encoder for encoding the textual prompt in addition to the visual features. ‘Cross-modal grad.’ computes gradients from both paths.

| Prompt Encoder                       | $\Delta$ #Params<br>(frozen) | DocVQA      | ChartQA     |
|--------------------------------------|------------------------------|-------------|-------------|
|                                      |                              | ANLS        | RA          |
| Embedding                            | -                            | 71.4        | 55.4        |
| TinyBERT [8]                         | 8M                           | 71.3        | 56.2        |
| T5-Base Enc. (Copy of the learnt LM) | -                            | 71.7        | 56.0        |
| T5-Small Enc.                        | 39M                          | 72.0        | 56.3        |
| <b>T5-Base Enc.</b>                  | <b>113M</b>                  | <b>72.2</b> | <b>57.1</b> |

**Fig. 3: ViLMA Attention Maps.** Attention maps of the last ViLMA layer activated at words from the input prompt, the frames are colored according to the colored prompt tokens and the highly activated visual tokens are explicitly written inside the boxes. Top rows: VisFocus. Bottom rows: VisFocus **without** LMPM pre-training.

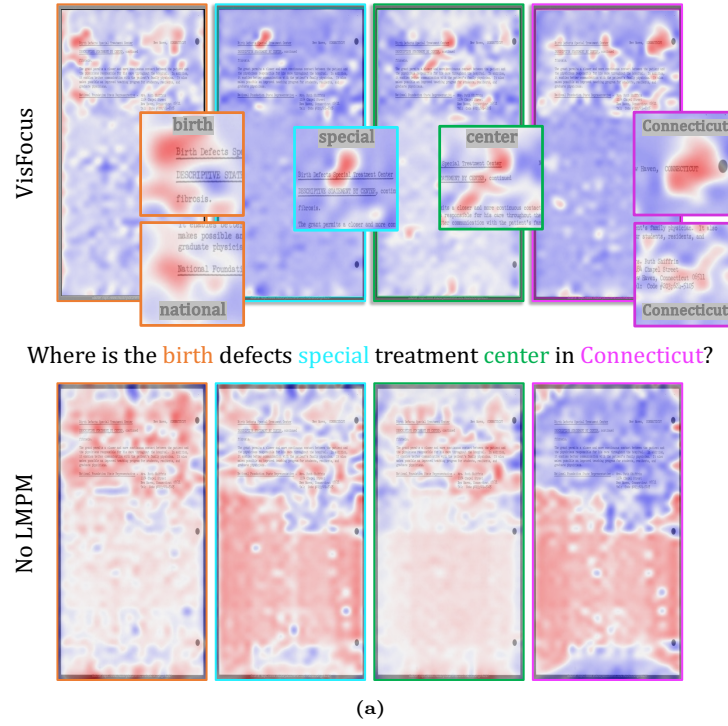

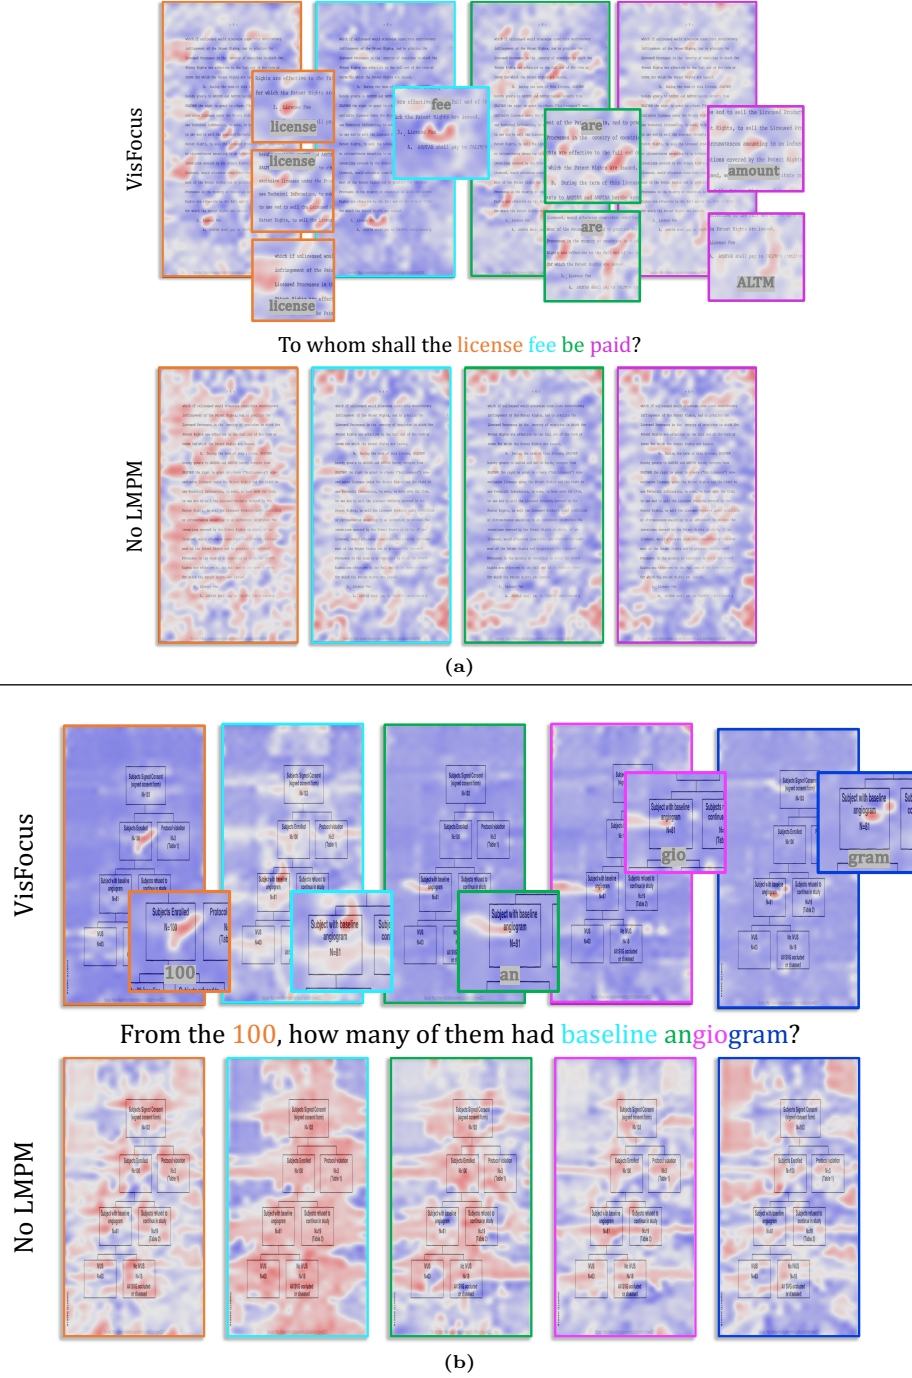

Fig. 4: Fig. 3 continued.

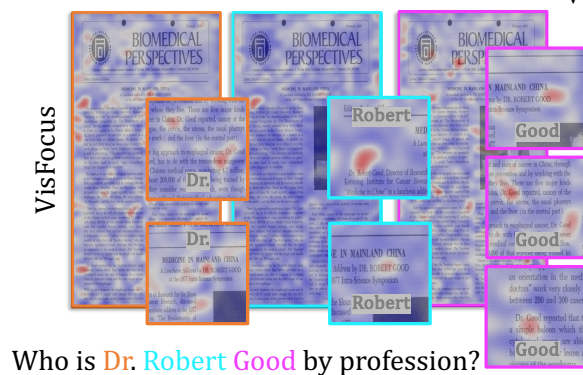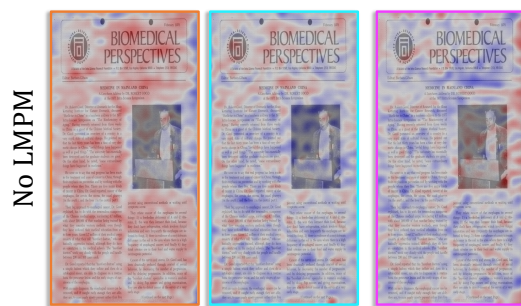

(a)

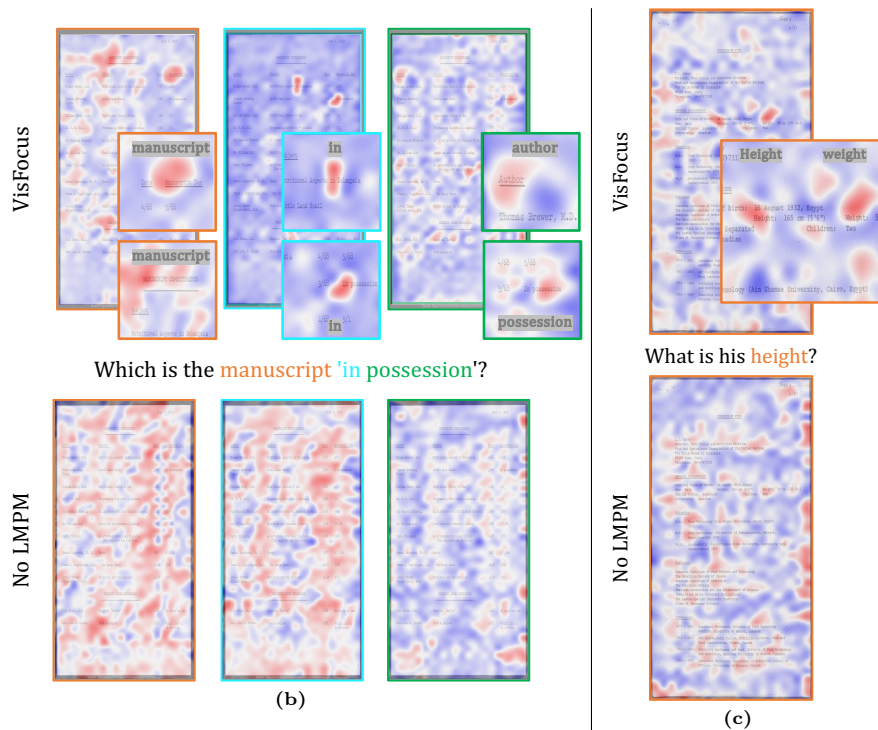

Fig. 5: Fig. 3 continued.

**Fig. 6: Qualitative comparison.** Further examples from the DocVQA validation set, demonstrating VisFocus’s ability to accurately answer questions on denser documents, compared to previous SoTA (Pix2Struct-B) and to our baseline

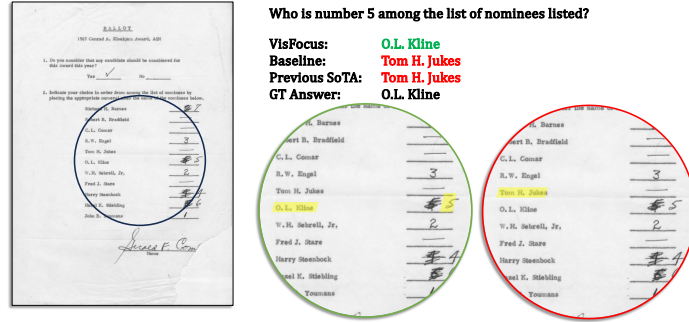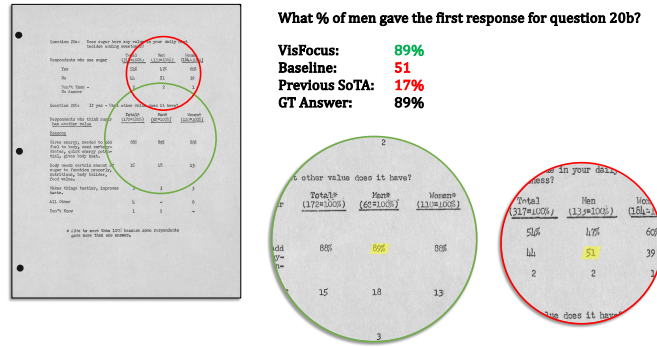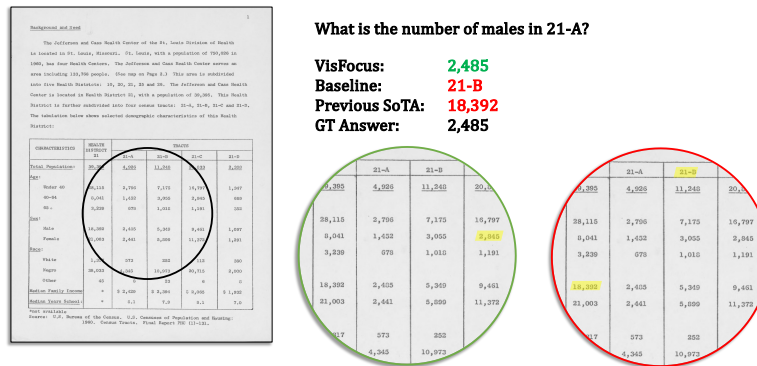



[illegible]

**What is the “unit of quantity” of Paperboards and paper?**

|                |            |
|----------------|------------|
| VisFocus:      | tonne      |
| Baseline:      | industrial |
| Previous SoTA: | 3,01,196   |
| GT Answer:     | Tonne      |

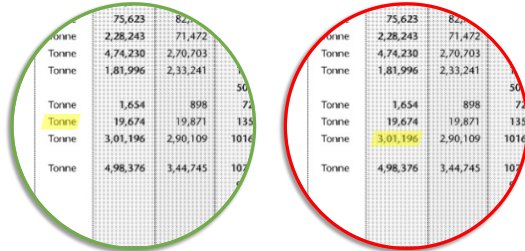[illegible]

**In Baltimore, what is the no. of stepped cases, whose living status is known?**

|                |                             |
|----------------|-----------------------------|
| VisFocus:      | 482                         |
| Baseline:      | by fleeing the jurisdiction |
| Previous SoTA: | 8                           |
| GT Answer:     | 482                         |

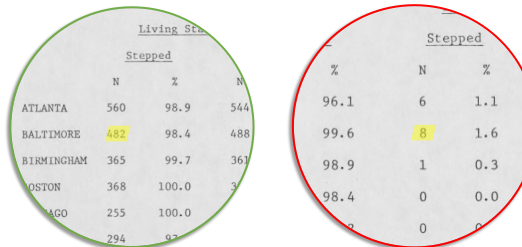

**Fig. 7:** Fig. 6 continued.

**Fig. 8: Qualitative comparison.** Further examples from ChartQA test set, demonstrating VisFocus’s ability to accurately answer questions on visual data such as charts and plots, compared to previous SoTA (Pix2Struct-B) and to our baseline. The last example shows a fail case for all of the compared methods.

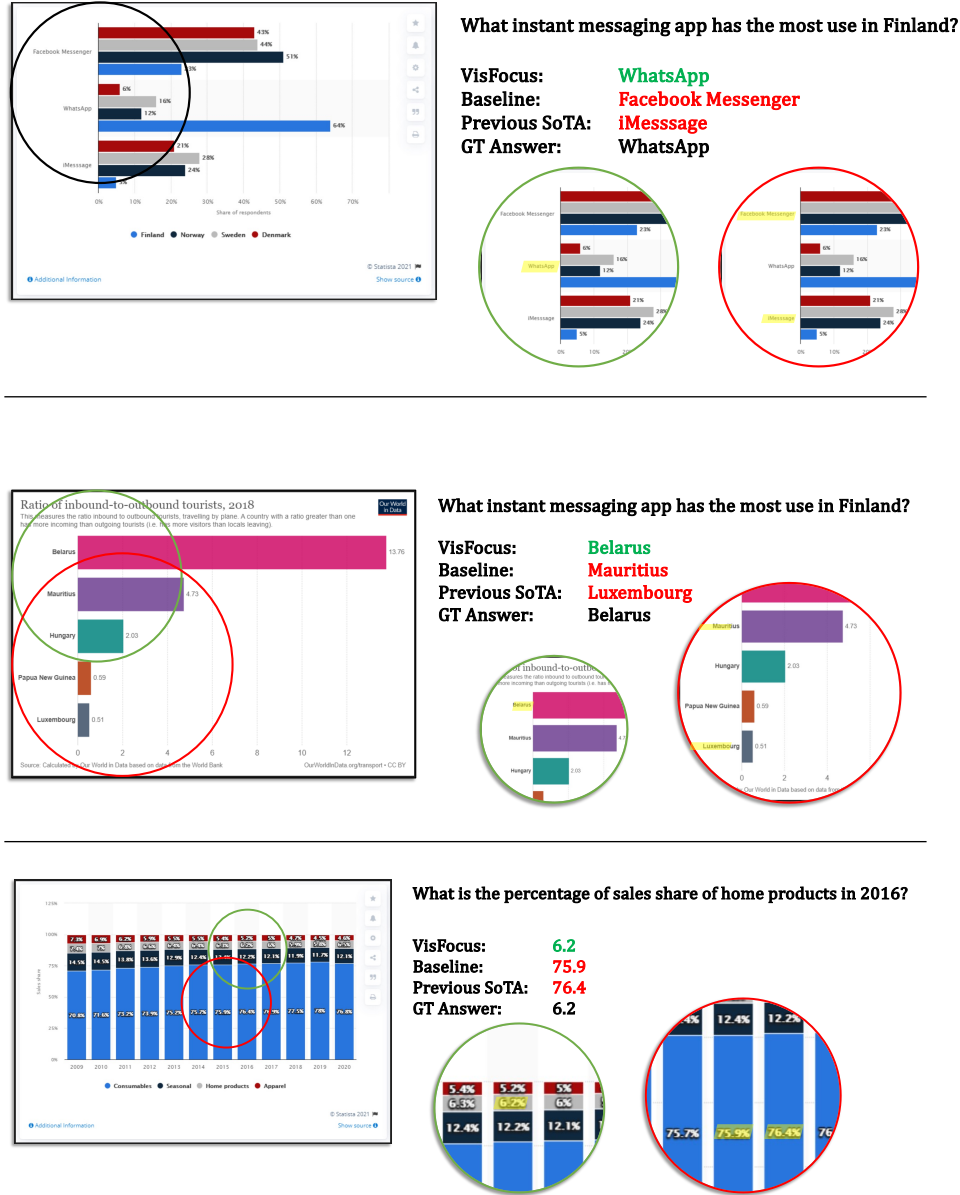

**Fig. 9:** Fig. 6 continued.



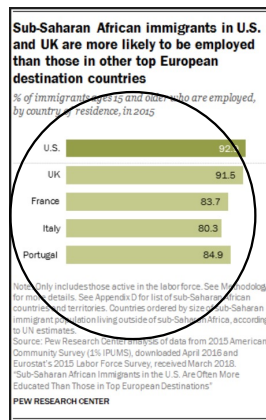

Which country does the Dark green represent?

VisFocus: U.S  
 Baseline: Portugal  
 Previous SoTA: Portugal  
 GT Answer: U.S

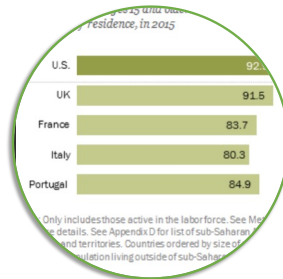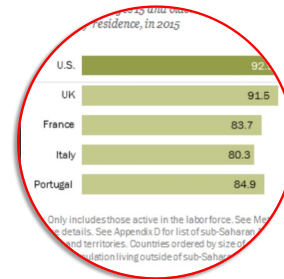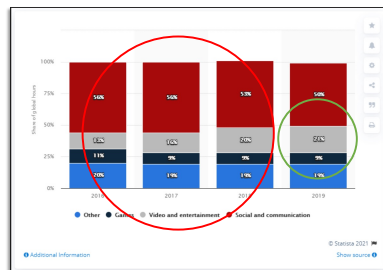

What's the percentage of social and communication in 2016?

VisFocus: 56  
 Baseline: 19  
 Previous SoTA: 13  
 GT Answer: 21

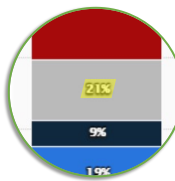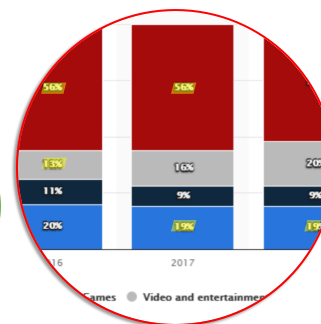

Fig. 10: Fig. 6 continued.

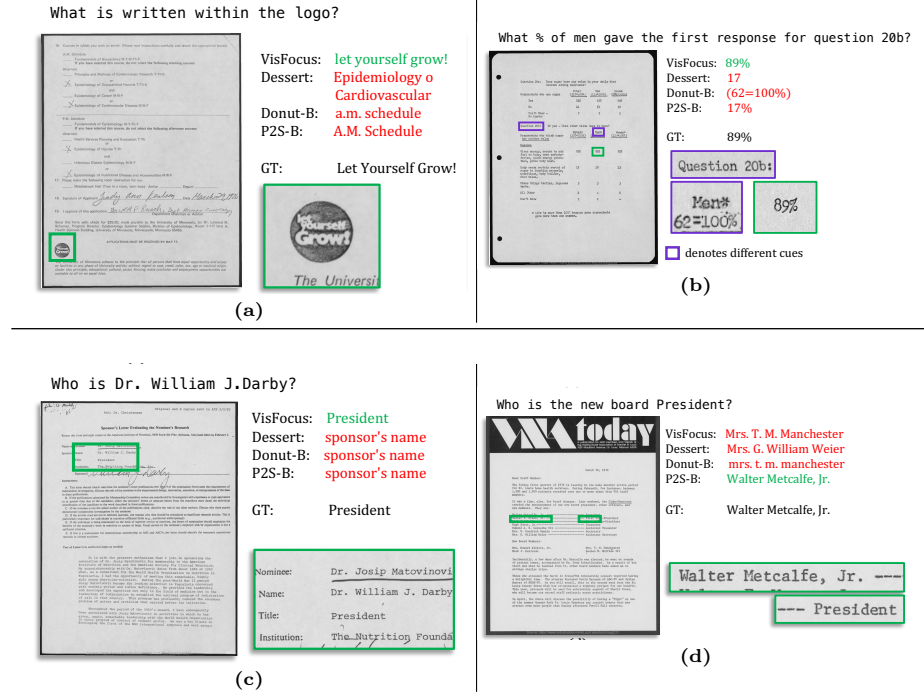

**Fig. 11: Qualitative comparison.** Further success cases of VisFocus, compared to the failures of other OCR-free methods: Dessurt, Donut and Pix2Struct-B.

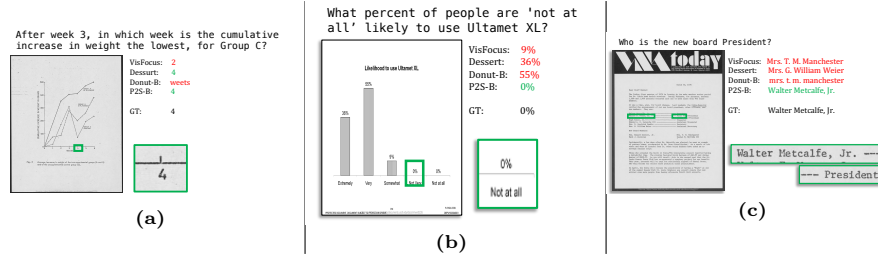

**Fig. 12: Qualitative comparison.** Failure examples of cases where VisFocus fails and other OCR-free methods: Dessurt, Donut and Pix2Struct-B succeed better.

## References

1. Appalaraju, S., Tang, P., Dong, Q., Sankaran, N., Zhou, Y., Manmatha, R.: Docformerv2: Local features for document understanding. In: AAAI Conference on Artificial Intelligence (2024) [2](#)
2. Baechler, G., Sunkara, S., Wang, M., Zubach, F., Mansoor, H., Etter, V., Cărbune, V., Lin, J., Chen, J., Sharma, A.: Screenai: A vision-language model for ui and infographics understanding. arXiv preprint arXiv:2402.04615 (2024) [2](#)
3. Biten, A.F., Tito, R., Gomez, L., Valveny, E., Karatzas, D.: Ocr-idl: Ocr annotations for industry document library dataset. In: European Conference on Computer Vision. pp. 241–252. Springer (2022) [3](#), [6](#)
4. Davis, B., Morse, B., Price, B., Tensmeyer, C., Wigington, C., Morariu, V.: End-to-end document recognition and understanding with dessurt. In: European Conference on Computer Vision. pp. 280–296. Springer (2022) [2](#), [4](#), [6](#)
5. Harley, A.W., Ufkes, A., Derpanis, K.G.: Evaluation of deep convolutional nets for document image classification and retrieval. In: International Conference on Document Analysis and Recognition (ICDAR) [4](#), [6](#)
6. Huang, Y., Lv, T., Cui, L., Lu, Y., Wei, F.: Layoutlmv3: Pre-training for document ai with unified text and image masking. In: Proceedings of the 30th ACM International Conference on Multimedia. pp. 4083–4091 (2022) [2](#)
7. Jaume, G., Ekenel, H.K., Thiran, J.P.: Funsd: A dataset for form understanding in noisy scanned documents (2019) [3](#), [4](#)
8. Jiao, X., Yin, Y., Shang, L., Jiang, X., Chen, X., Li, L., Wang, F., Liu, Q.: Tinybert: Distilling bert for natural language understanding (2019) [6](#), [7](#)
9. Kembhavi, A., Salvato, M., Kolve, E., Seo, M., Hajishirzi, H., Farhadi, A.: A diagram is worth a dozen images. ArXiv [abs/1603.07396](#) (2016), <https://api.semanticscholar.org/CorpusID:2682274> [6](#)
10. Kim, G., Hong, T., Yim, M., Park, J., Yim, J., Hwang, W., Yun, S., Han, D., Park, S.: Donut: Document understanding transformer without ocr. arXiv preprint arXiv:2111.15664 [7](#), [15](#) (2021) [2](#), [4](#), [6](#)
11. Lee, K., Joshi, M., Turc, I.R., Hu, H., Liu, F., Eisenschlos, J.M., Khandelwal, U., Shaw, P., Chang, M.W., Toutanova, K.: Pix2struct: Screenshot parsing as pretraining for visual language understanding. In: International Conference on Machine Learning. pp. 18893–18912. PMLR (2023) [2](#), [4](#), [6](#)
12. Lewis, D., Agam, G., Argamon, S., Frieder, O., Grossman, D., Heard, J.: Building a test collection for complex document information processing. In: Proceedings of the 29th Annual International ACM SIGIR Conference on Research and Development in Information Retrieval. p. 665–666. SIGIR '06, Association for Computing Machinery, New York, NY, USA (2006). <https://doi.org/10.1145/1148170.1148307> [4](#)
13. Loshchilov, I., Hutter, F.: SGDR: stochastic gradient descent with restarts. CoRR [abs/1608.03983](#) (2016), <http://arxiv.org/abs/1608.03983> [5](#)
14. Loshchilov, I., Hutter, F.: Fixing weight decay regularization in adam. CoRR [abs/1711.05101](#) (2017), <http://arxiv.org/abs/1711.05101> [5](#)
15. Masry, A., Long, D., Tan, J.Q., Joty, S., Hoque, E.: ChartQA: A benchmark for question answering about charts with visual and logical reasoning. In: Findings of the Association for Computational Linguistics: ACL 2022. pp. 2263–2279. Association for Computational Linguistics, Dublin, Ireland (May 2022). <https://doi.org/10.18653/v1/2022.findings-acl.177>, <https://aclanthology.org/2022.findings-acl.177> [5](#)

16. Mathew, M., Bagal, V., Tito, R., Karatzas, D., Valveny, E., Jawahar, C.: Info-graphicvqa. In: Proceedings of the IEEE/CVF Winter Conference on Applications of Computer Vision. pp. 1697–1706 (2022) [5](#)
17. Mathew, M., Karatzas, D., Jawahar, C.: Docvqa: A dataset for vqa on document images. In: Proceedings of the IEEE/CVF winter conference on applications of computer vision. pp. 2200–2209 (2021) [4](#)
18. Mishra, A., Shekhar, S., Singh, A.K., Chakraborty, A.: Ocr-vqa: Visual question answering by reading text in images. In: ICDAR (2019) [6](#)
19. Raffel, C., Shazeer, N., Roberts, A., Lee, K., Narang, S., Matena, M., Zhou, Y., Li, W., Liu, P.J.: Exploring the limits of transfer learning with a unified text-to-text transformer. arXiv e-prints (2019) [6](#)
20. Tang, Z., Yang, Z., Wang, G., Fang, Y., Liu, Y., Zhu, C., Zeng, M., Zhang, C.Y., Bansal, M.: Unifying vision, text, and layout for universal document processing. 2023 IEEE/CVF Conference on Computer Vision and Pattern Recognition (CVPR) pp. 19254–19264 (2022), <https://api.semanticscholar.org/CorpusID:254275326> [2](#)
